# Supplementary material
Source: JCI journal article supplement (doi:10.1172/jci193779)
Supplement: sd1 [file 1]

## **Supplemental Methods**

### **TotalSeq Heme Oncology Cocktail Clones**

CD64 (clone 10.1), CD34 (clone 581), CD90 (clone 5e10), CD117 (clone 104D2), CD304 (clone 12C2), CD303 (clone 201A), CD45 (clone 2D1), CD16 (clone 3G8), CD56 (clone 5.1H11), CD123 (clone 6H6), CD49d (clone 9F10), FcεR1α (clone AER-37), CD62P (clone AK4), CD25 (clone BC96), CD30 (clone BY88), CD7 (clone CD7-6B7), CD71 (clone CY1G4), CD62L (clone DREG-56), CD69 (clone FN50), CD163 (clone GHI/61), CD83 (clone HB15e), CD45RA (clone HI100), CD10 (clone HI10a), CD19 (clone HIB19), CD38 (clone HIT2), CD11b (clone ICRF44), CD44 (clone IM7), CD1c (clone L161), HLA-DR (clone L243), CD14 (clone M5E2), CD141 (clone M80), CD138 (clone MI15), CD33 (clone P67.6), CD4 (clone RPA-T4), CD22 (clone S-HCL-1), CD11c (clone S-HCL-3), CD8 (clone SK1), CD2 (clone TS1/8), CD45RO (clone UCHL1), CD3 (clone UCHT1), CD5 (clone UCHT2), CD13 (clone WM15).

## Primary AML Immunophenotyping Antibodies and Cell Surface Marker Profiles

| Specificity    | Clone         | Manufacturer | Cat no |
|----------------|---------------|--------------|--------|
| CD33           | WM53          | BD           | 568374 |
| CD45           | HI30          | BD           | 569101 |
| LIVE DEAD Blue | --            | Thermo       | L23105 |
| CD99           | TU12          | BD           | 749011 |
| CD5            | UCHT2         | BD           | 751289 |
| CD304          | MAB3          | BD           | 756730 |
| CD47           | CC2C6         | BD           | 753791 |
| HLA DR         | G46-6         | BD           | 568335 |
| CD34           | QBEND/10.rMAb | BD           | 568861 |
| CD4            | OKT4          | BioLegend    | 317423 |
| CD303          | V24-785       | BD           | 748006 |
| CD16           | 3G8           | Biolegend    | 302047 |
| CD11b          | IGRF44        | Biolegend    | 301325 |
| CD163          | GHI/61        | Biolegend    | 333616 |
| CD37           | M-T701        | BD           | 742400 |
| CD83           | HB15e         | BioLegend    | 305333 |
| CD206          | 19.2          | BD           | 746891 |
| CD90           | 5E10          | Biolegend    | 328141 |
| CD13           | WM15          | BD           | 564549 |
| CD8            | SK1           | BioLegend    | 344760 |
| CD14           | 63D3          | Biolegend    | 367147 |
| CD200          | MRC OX-104    | BD           | 759116 |
| CD15           | W6D3          | BioLegend    | 323018 |
| CD7            | M-T 701       | BD           | 566488 |
| FceR1a         | AER-37        | BD           | 757889 |
| CD86           | 2331 (FUN-1)  | BD           | 757163 |
| CD71           | M-A712        | BD           | 755839 |
| CD117          | S18022G       | BioLegend    | 375205 |
| CD1c           | L161          | Biolegend    | 331531 |
| CD3            | SK7           | BioLegend    | 344859 |
| CD56           | B159          | BD           | 571468 |
| PD-1           | EH12.2H7      | BioLegend    | 329973 |
| CD141          | M80           | Biolegend    | 344109 |
| CD19           | HIB19         | Biolegend    | 302287 |
| CD11c          | Bu15          | BioLegend    | 337207 |
| CD41           | HIP8          | Biolegend    | 303725 |
| CD38           | HB7           | BD           | 567987 |
| CD64           | 10.1          | BioLegend    | 305035 |
| CD123          | 6H6           | BioLegend    | 306053 |

CD34+/CD38+ cells (CD45+/CD3-/CD19-/CD7+/-/CD56+/-/CD34+/CD38+)

CD34+/CD38- cells (CD45+/CD3-/CD19-/CD7+/-/CD56+/-/CD34+/CD38-)

CD14+ Monocytes (CD45+/CD3-/CD19-/CD7+/-/CD56+/-/CD34-/CD38+/HLA-DR+/CD123-/CD14+/CD11c+/-),

pre-cDCs (CD45+/CD3-/CD19-/CD7+/-/CD56+/-/CD34-/CD38+/HLA-DR+/CD123+/CD303-/CD304-/CD11c+/CD33+)

pDCs (CD45+/CD3-/CD19-/CD7+/-/CD56+/-/CD34-/CD38+/HLA-DR+/CD123+/CD303+ and/or CD304+)

CD1c+ DCs (CD45+/CD3-/CD19-/CD7+/-/CD56+/-/CD34-/CD38+/HLA-DR+/CD123-/CD14-/CD11c+/CD1c+/CD141-)

CD41+ DCs (CD45+/CD3-/CD19-/CD7+/-/CD56+/-/CD34-/CD38+/HLA-DR+/CD123-/CD14-/CD11c+/CD1c-/CD141+)

Immature DCs (CD45+/CD3-/CD19-/CD7+/-/CD56+/-/CD34-/CD38+/HLA-DR+/CD123-/CD14-/CD11c+/CD1c-/CD141-)

### **Primary AML Peripheral Blood *In Vitro* CpG Stimulation**

Primary AML peripheral blood samples were sterilely thawed and suspended at 1e6 cells/mL in StemSpan (StemCell) supplemented with 100ng/mL FLT3 ligand (PeproTech), 10ng/mL SCF (PeproTech), 50ng/mL TPO (PeproTech), and 1ug/mL Stemregenin (StemCell). Cells were cultured with 10ug of CpG (ODN 2216) (InvivoGen) overnight from which supernatant was collect and stored at -80°C. Supernatant was then thawed and cytokines were analyzed using the Human Anti-Virus Response Panel 1 (Biolegend). Samples were run on the Cytex Aurora (Cytex Biosciences), and 3,000 events were collected per sample.

**Murine Peripheral Blood Immunophenotyping Antibodies**

| <b>Specificity</b> | <b>Clone</b> | <b>Vendor</b> | <b>Cat no</b> |
|--------------------|--------------|---------------|---------------|
| CD8                | 53-6.7       | BD            | 563786        |
| CD45               | I3/2.3       | BD            | 752411        |
| CD43               | S7           | BD            | 752307        |
| CD3                | 145-2C11     | BD            | 750638        |
| I-A/I-E (MHCII)    | 2G9          | BD            | 748708        |
| CD27               | LG.3A10      | BD            | 741959        |
| SiglecH            | 440c         | BD            | 566581        |
| Sytox Blue         |              | Thermo        | S34857        |
| CD45R (B220)       | RA3-6B2      | Biologend     | 103248        |
| Ly6C               | AL-21        | BD            | 563011        |
| CX3CR1             | SA011F11     | Biologend     | 149033        |
| NK1.1              | PK136        | BD            | 569723        |
| CD44               | IM7          | BD            | 563736        |
| CD11b              | M1/70        | Biologend     | 101206        |
| Ly6G               | 1A8          | Biologend     | 127654        |
| CD19               | 1D3          | BD            | 566411        |
| CD62L              | MEL-14       | BD            | 569209        |
| cKit               | ACK2         | BD            | 567471        |
| CD25               | PC61         | BD            | 552880        |
| Ly6A/E (Sca1)      | D7           | Biologend     | 108118        |
| CD11c              | N418         | Biologend     | 117352        |
| CD4                | GK1.5        | Biologend     | 100480        |

### Murine Splenocyte Immunophenotyping Antibodies and Cell Surface Marker Profiles

| Specificity | Clone         | Vendor    | Cat no     |
|-------------|---------------|-----------|------------|
| CD11b       | M1/70         | BD        | 563553     |
| Live/Dead   |               | Thermo    | L23105     |
| CD45.2      | 104           | BD        | 569670     |
| CD23        | B3B4          | BD        | 741228     |
| CD43        | S7            | BD        | 752307     |
| CD24        | 30-F1         | BD        | 752765     |
| MHC II      | 2G9           | BD        | 748708     |
| CD27        | LG.3A10       | BD        | 741959     |
| Siglec H    | 440c          | BD        | 566581     |
| CD93        | AA4.1         | Thermo    | 62589282   |
| Ter119      | TER-119       | Thermo    | 48-5921-82 |
| Sca1        | D7            | BD        | 746663     |
| CD45.1      | A20           | BioLegend | 110741     |
| Ly6C        | HK1.4         | BioLegend | 128030     |
| NK1.1       | PK136         | BioLegend | 108753     |
| CX3CR1      | SA011F11      | BioLegend | 149033     |
| CD44        | IM7           | BD        | 563971     |
| CD8a        | 5H10-1        | BD        | 752630     |
| IgM         | R6-60.2       | BD        | 564028     |
| CD138       | 281-2         | BD        | 564511     |
| CD4         | GK1.5         | BioLegend | 100406     |
| CD11c       | N418          | BioLegend | 117366     |
| Ly6G        | 1A8           | BioLegend | 127654     |
| CD21/35     | eBio4E3 (4E3) | Thermo    | 46021282   |
| cKit        | ACK2          | BD        | 567471     |
| F4/80       | QA17A29       | BioLegend | 157312     |
| CD172a      | P84           | BioLegend | 144016     |
| CD19        | 6D5           | BioLegend | 115574     |
| CD49b       | DX5           | Thermo    | 35-597-180 |
| CD206       | C068C2        | BioLegend | 141720     |
| CD317       | 927           | BioLegend | 127016     |
| CD3         | 17A2          | BD        | 557869     |
| IgD         | 11-26c.2a     | BioLegend | 405750     |
| CD86        | GL1           | BD        | 565479     |
| CD5         | 53-7.3        | BioLegend | 100634     |
| B220        | RA3-6B2       | BioLegend | 103277     |

Cell surface marker profiles were defined as:

neutrophils (CD45.2+/CD3-/CD19-/NK1.1-/Ly6G+),

macrophages (CD45.2+/CD3-/CD19-/NK1.1-/Ly6G-/CD11c-/F4-80+),

monocytes (CD45.2+/CD3-/CD19-/NK1.1-/Ly6G-/CD11c-/CD11b+/F4/80low/CX3CR1+),

cDC1s (CD45.2+/CD3-/CD19-/NK1.1-/Ly6G-/CD11c+/B220-/MHC II+/CD172a+/-/CD11b+)

cDC2s (CD45.2+/CD3-/CD19-/NK1.1-/Ly6G-/CD11c+/B220-/MHC II+/CD172a-/CD11b-/CD24+/CD8a+)

pDCs (CD45.2+/CD3-/CD19-/NK1.1-/Ly6G-/CD11c+/MHC II+/B220+).

**LSK Engraftment Sorting Antibodies**

| Specificity | Clone    | Vendor    | Cat no |
|-------------|----------|-----------|--------|
| CD11b       | M1/70    | BD        | 563553 |
| CD45.2      | 104      | BD        | 741092 |
| B220        | RA3-6B2  | BD        | 612838 |
| SiglecH     | 440c     | BD        | 566581 |
| Sytox Blue  |          | Thermo    | S34857 |
| Ly6C        | HK1.4    | BioLegend | 128030 |
| CD11c       | N418     | BioLegend | 117349 |
| CD19        | 1D3      | BD        | 564509 |
| CD3         | 145-2C11 | BioLegend | 100306 |
| Ter119      | TER-119  | BioLegend | 116206 |
| FceR1       | MAR-1    | BioLegend | 134306 |
| NK1.1       | S17016D  | BioLegend | 156522 |
| Sca1        | D7       | BD        | 742089 |
| cKit        | ACK2     | BD        | 567471 |
| CD317       | 927      | BioLegend | 127016 |
| Ly6G        | 1A8      | BD        | 565369 |
|             |          |           |        |

**Lineage positive Engraftment Sorting Antibodies**

| Specificity | Clone    | Vendor    | Cat no |
|-------------|----------|-----------|--------|
| CD11b       | M1/70    | BD        | 563553 |
| CD45.2      | 104      | BD        | 741092 |
| B220        | RA3-6B2  | BD        | 612838 |
| CD8a        | 5H10-1   | BD        | 752640 |
| SiglecH     | 440c     | BD        | 566581 |
| Sytox Blue  |          | Thermo    | S34857 |
| Ly6C        | HK1.4    | BioLegend | 128030 |
| CD11c       | N418     | BioLegend | 117349 |
| CD19        | 1D3      | BD        | 564509 |
| CD3         | 145-2C11 | BioLegend | 100306 |
| Ter119      | TER-119  | BioLegend | 116206 |
| FceR1       | MAR-1    | BioLegend | 134306 |
| NK1.1       | S17016D  | BioLegend | 156522 |
| cKit        | ACK2     | BD        | 567471 |
| CD317       | 927      | BioLegend | 127016 |
| Ly6G        | 1A8      | BD        | 565369 |
| CD24        | 30-F1    | BD        | 567843 |

**Murine Bone Marrow Dendritic Cell Differentiation Flow**

| Specificity | Clone   | Vendor    | Cat no |
|-------------|---------|-----------|--------|
| CD11b       | M1/70   | BD        | 563553 |
| Live/Dead   |         | Thermo    | L23105 |
| CD24        | 30-F1   | BD        | 752765 |
| MHC II      | 2G9     | BD        | 748708 |
| Siglec H    | 440c    | BD        | 566581 |
| Sca1        | D7      | BD        | 746663 |
| Ly6C        | HK1.4   | BioLegend | 128030 |
| CD8a        | 5H10-1  | BD        | 752630 |
| CD11c       | N418    | BioLegend | 117366 |
| Ly6G        | 1A8     | BioLegend | 127654 |
| cKit        | ACK2    | BD        | 567471 |
| F4/80       | QA17A29 | BioLegend | 157312 |
| CD172a      | P84     | BioLegend | 144016 |
| CD19        | 6D5     | BioLegend | 115574 |
| CD206       | C068C2  | BioLegend | 141720 |
| CD317       | 927     | BioLegend | 127016 |
| CD3         | 17A2    | BD        | 557869 |
| CD86        | GL1     | BD        | 565479 |
| B220        | RA3-6B2 | BioLegend | 103277 |

**Supplemental Figures**

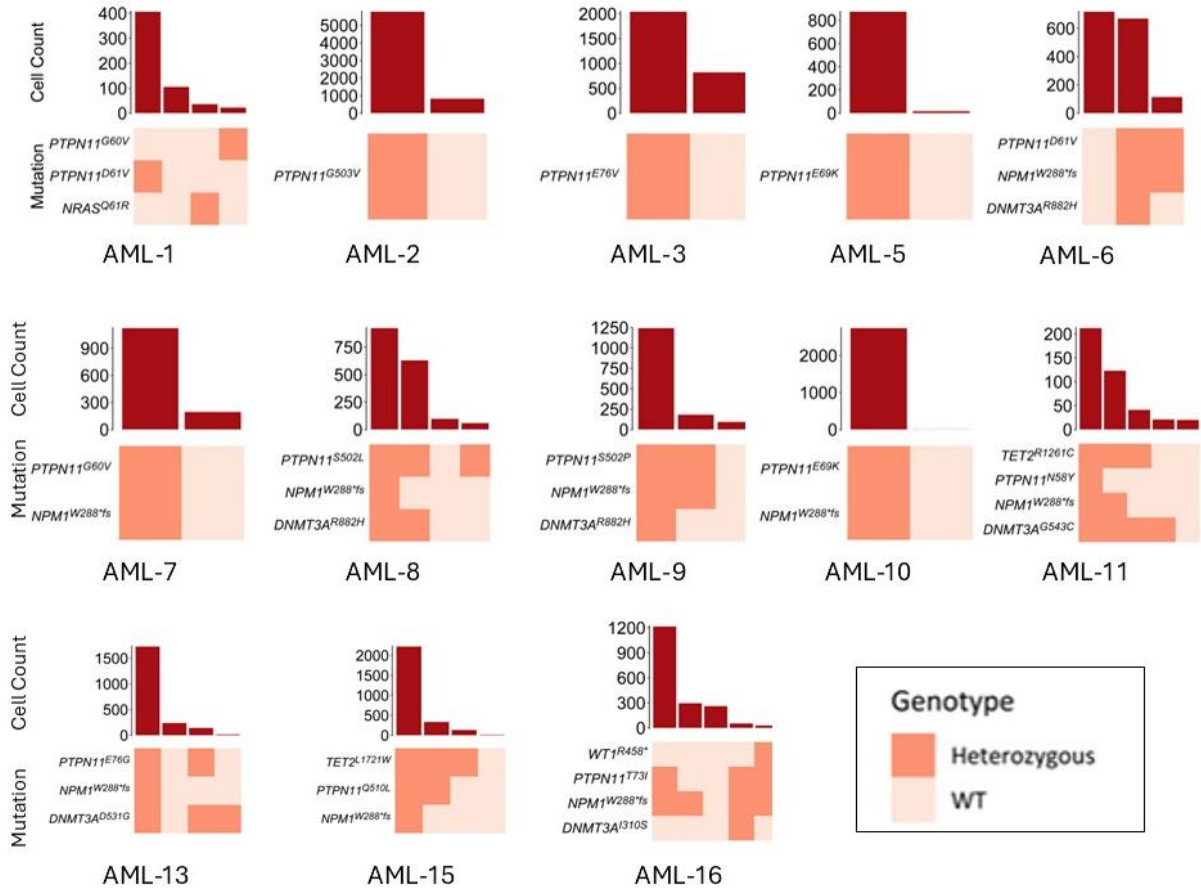

**Supplemental Figure 1.** Clonographs for peripheral blood and bone marrow samples from AML patients at diagnosis. For each sample, the histogram represents the number of cells within each clone ranked in decreasing frequency and the heatmap represents zygosity for each mutation with light orange being wild-type and dark orange being heterozygous.

Table 1. Comparison of variant allele frequencies identified by bulk and single-cell DNA sequencing

| Patient ID | Gene                              | Bulk sequencing VAF | Tapestri VAF |
|------------|-----------------------------------|---------------------|--------------|
| AML1       | <i>PTPN11</i> <sup>D61V</sup>     | 0.3398              | 0.3726       |
|            | <i>ANKRD26</i> <sup>E1110fs</sup> | 0.5332              | NC           |
|            | <i>NRAS</i> <sup>Q61R</sup>       | --                  | 0.0496       |
|            | <i>PTPN11</i> <sup>G60V</sup>     | --                  | 0.0209       |
| AML-2      | <i>PTPN11</i> <sup>G503V</sup>    | 0.4176              | 0.4526       |
|            | <i>BCOR</i> <sup>DL442</sup>      | 0.8891              | NC           |
| AML3       | <i>PTPN11</i> <sup>E76V</sup>     | 0.3874              | 0.4003       |
|            | <i>BCOR</i> <sup>P142P?</sup>     | 0.3668              | NC           |
| AML5       | <i>PTPN11</i> <sup>E69K</sup>     | 0.3814              | 0.4675       |
|            | <i>KMT2A</i> <sup>K1211Q</sup>    | 0.4765              | NC           |
|            | <i>SAMHD1</i> <sup>G236V</sup>    | 0.4494              | NC           |
| AML6       | <i>PTPN11</i> <sup>D61V</sup>     | 0.5167              | 0.4311       |
|            | <i>NPM1</i> <sup>L287LC</sup>     | 0.5446              | 0.3948       |
|            | <i>DNMT3A</i> <sup>R882H</sup>    | 0.4112              | 0.3123       |
|            | <i>TET2</i> <sup>K1208E</sup>     | 0.473               | NC           |
|            | <i>BCOR</i> <sup>P838S</sup>      | 0.999               | NC           |
| AML7       | <i>PTPN11</i> <sup>G60V</sup>     | 0.4654              | 0.4556       |
|            | <i>NPM1</i> <sup>W288CM</sup>     | 0.4268              | 0.4439       |
|            | <i>TET2</i> <sup>C314W</sup>      | 0.4323              | NC           |
| AML8       | <i>PTPN11</i> <sup>S502L</sup>    | 0.4629              | 0.4757       |
|            | <i>NPM1</i> <sup>W288CQ</sup>     | 0.58                | 0.3205       |
|            | <i>DNMT3A</i> <sup>R882H</sup>    | 0.207               | 0.4115       |
|            | <i>SMC1A</i> <sup>R398Q</sup>     | 0.8721              | NC           |
| AML9       | <i>PTPN11</i> <sup>S502P</sup>    | 0.4458              | 0.4838       |
|            | <i>NPM1</i> <sup>L287LC</sup>     | 0.4274              | 0.4727       |
|            | <i>DNMT3A</i> <sup>R882H</sup>    | 0.4652              | 0.3516       |
|            | <i>SMC1A</i> <sup>R469P</sup>     | 0.0737              | NC           |
|            | <i>STAG2</i> <sup>L1110R</sup>    | 0.4382              | NC           |
| AML10      | <i>PTPN11</i> <sup>E69K</sup>     | 0.3913              | 0.4769       |
|            | <i>NPM1</i> <sup>L287LC</sup>     | 0.4048              | 0.4687       |
|            | <i>SF3A1</i> <sup>G413S</sup>     | 0.4386              | NC           |
| AML11      | <i>PTPN11</i> <sup>N58Y</sup>     | 0.4281              | 0.3522       |
|            | <i>NPM1</i> <sup>L287LC</sup>     | 0.3934              | 0.4581       |
|            | <i>DNMT3A</i> <sup>G543C</sup>    | 0.4198              | 0.4855       |
|            | <i>TET2</i> <sup>L230</sup>       | 0.4936              | 0.4769       |

|              |                                |        |        |
|--------------|--------------------------------|--------|--------|
| <b>AML13</b> | <i>PTPN11</i> <sup>E76G</sup>  | 0.4234 | 0.4334 |
|              | <i>NPM1</i> <sup>W288CM</sup>  | 0.3148 | 0.4486 |
|              | <i>DNMT3A</i> <sup>D342G</sup> | 0.2926 | 0.4466 |
|              | <i>SMC3</i> <sup>A244D</sup>   | 0.4932 | NC     |
| <b>AML15</b> | <i>PTPN11</i> <sup>Q510L</sup> | 0.4132 | 0.4284 |
|              | <i>NPM1</i> <sup>L287LC</sup>  | 0.4074 | 0.464  |
|              | <i>BIRC6</i> <sup>I4153L</sup> | 0.5421 | NC     |
|              | <i>TET2</i> <sup>L1721W</sup>  | --     | 0.4842 |
| <b>AML16</b> | <i>PTPN11</i> <sup>T73I</sup>  | 0.5087 | 0.2692 |
|              | <i>NPM1</i> <sup>L287LC</sup>  | 0.4211 | 0.4681 |
|              | <i>STAG2</i> <sup>N1223K</sup> | 0.4524 | NC     |
|              | <i>PI3CG</i> <sup>D358Y</sup>  | 0.4112 | NC     |
|              | <i>HNRNPK</i> <sup>Y280</sup>  | 0.4699 | NC     |
|              | <i>DNMT3A</i> <sup>I310S</sup> | --     | 0.0624 |
|              | <i>WT1</i> <sup>R458*</sup>    | --     | 0.0136 |

NC = Variant not covered by the panel

-- = mutation not called in bulk sequencing analysis

Supp Fig 2A

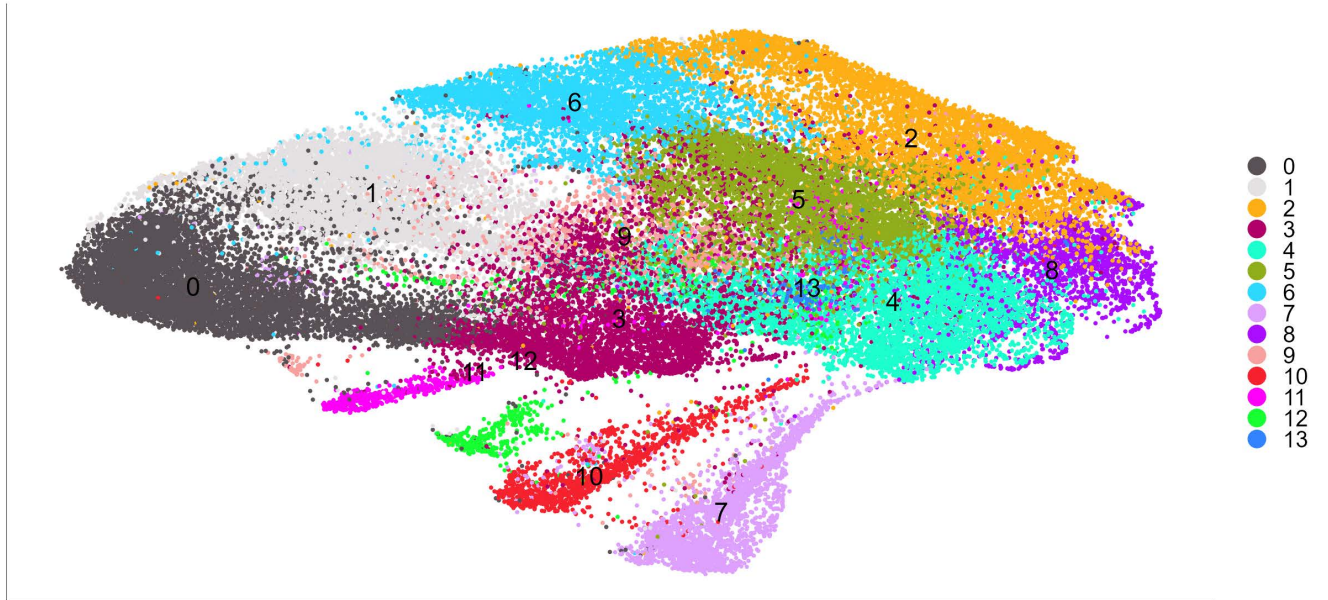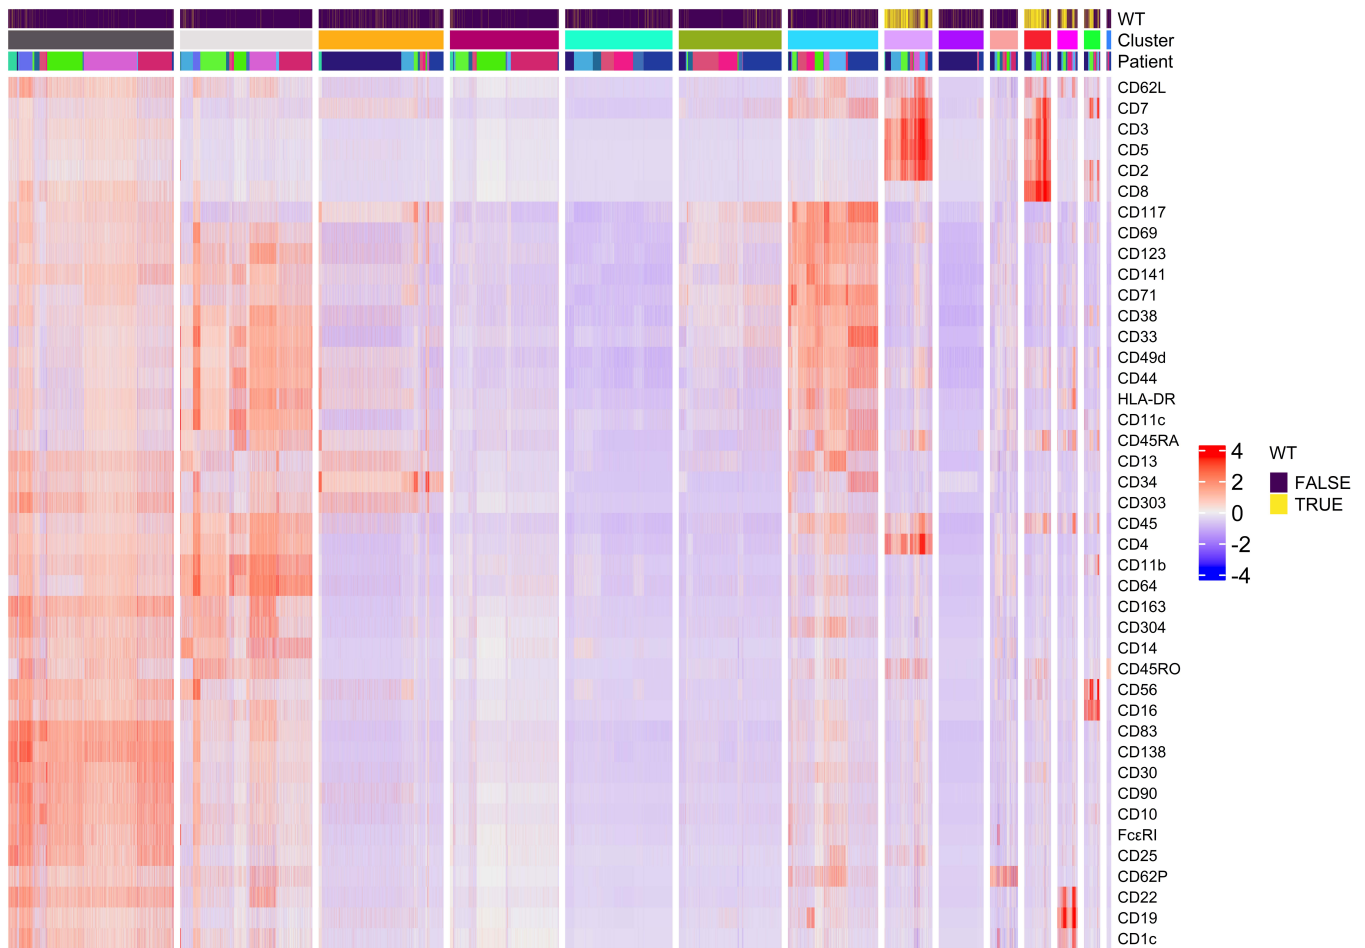

Supp Fig 2B

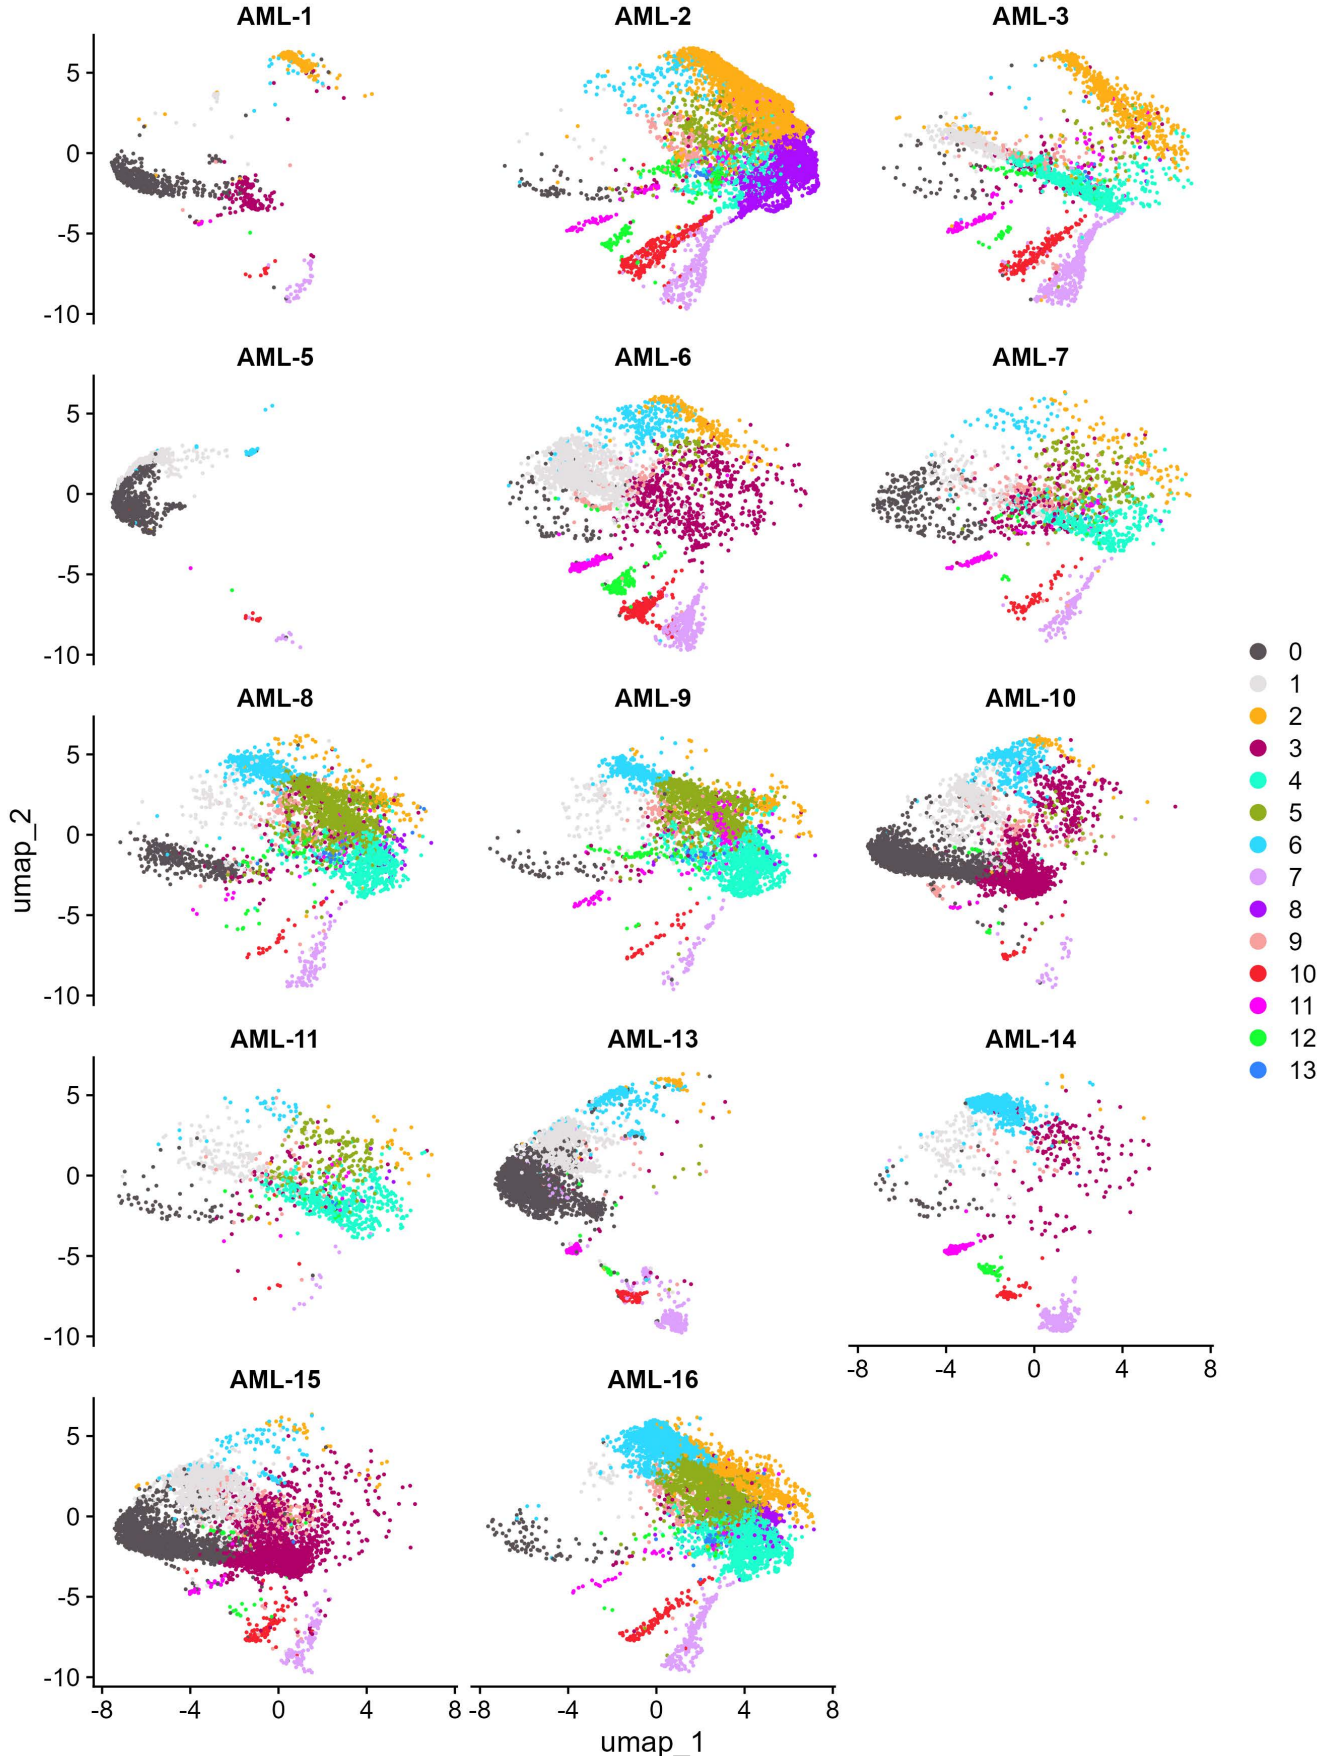

# Supp Fig 2C

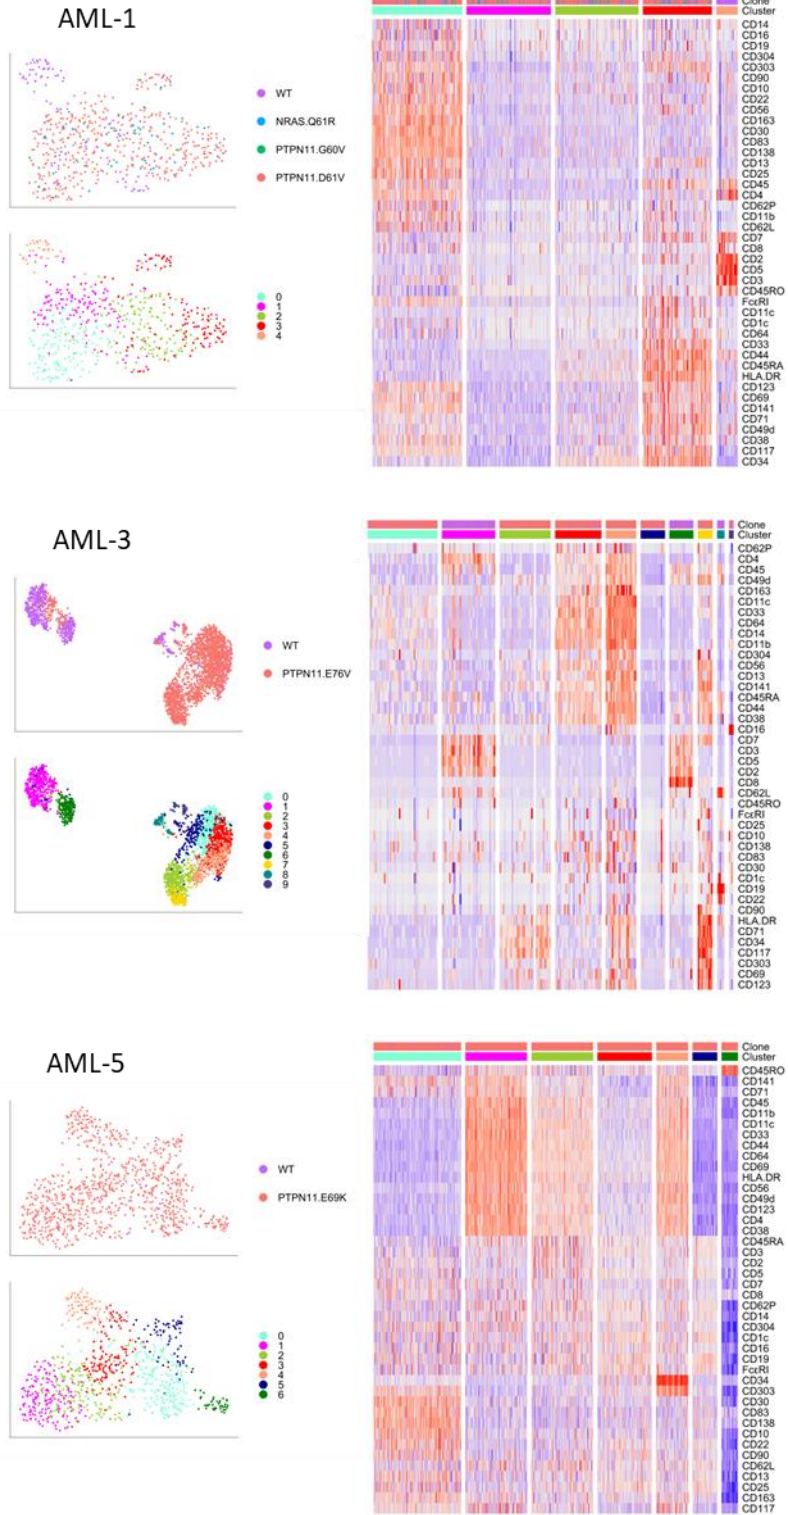

### AML-6

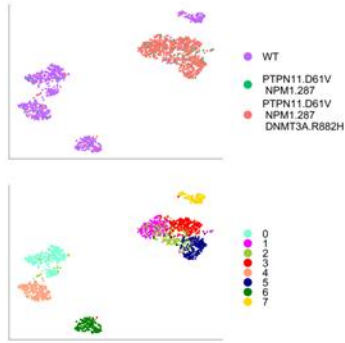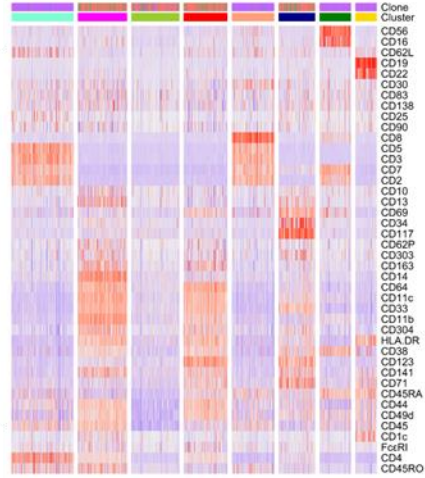

### AML-7

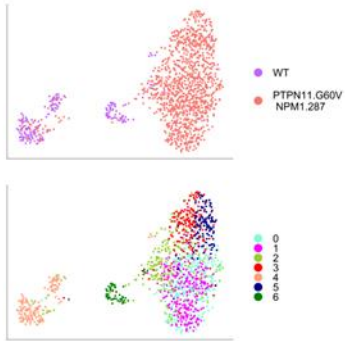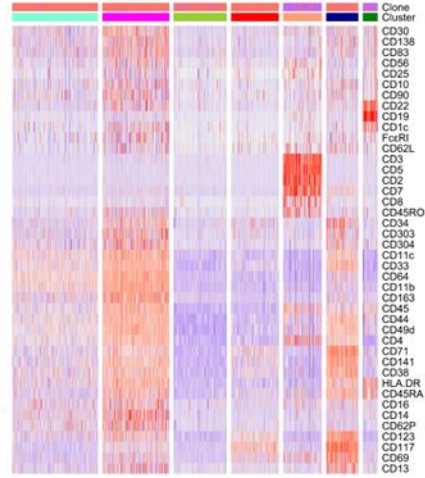

### AML-8

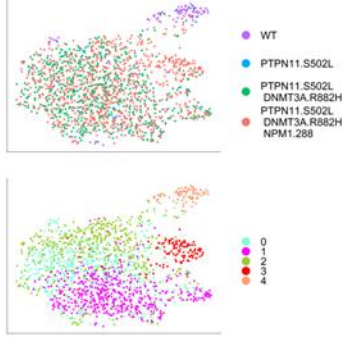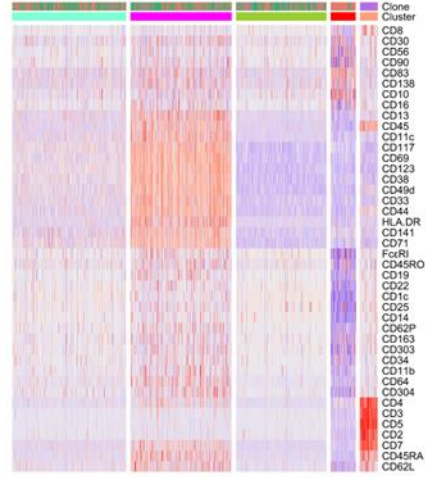

### AML-9

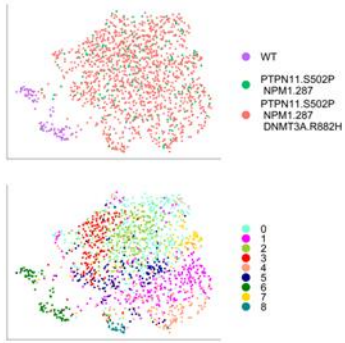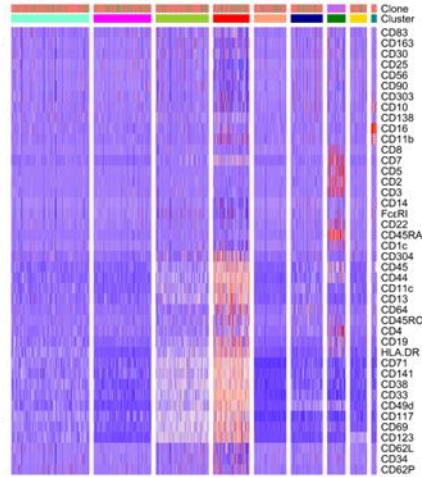

### AML-10

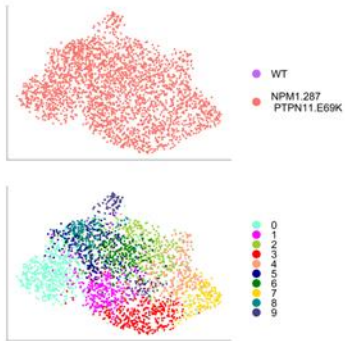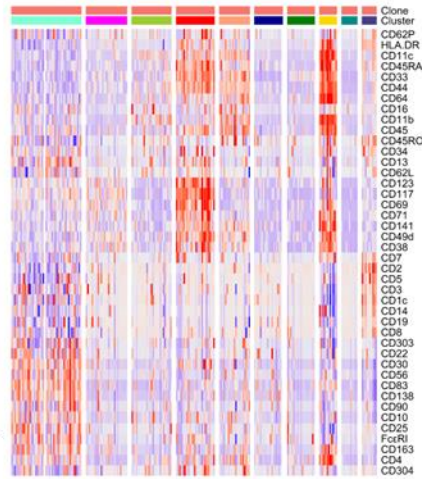

### AML-11

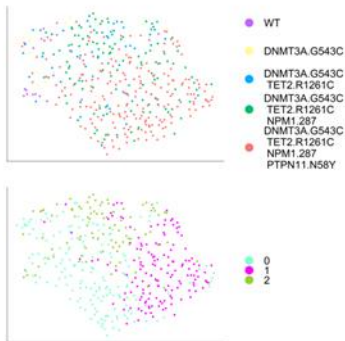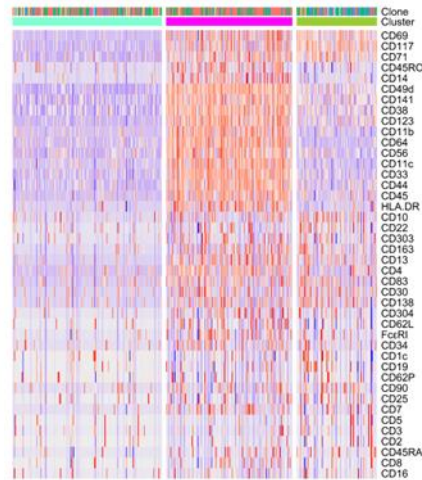

### AML-13

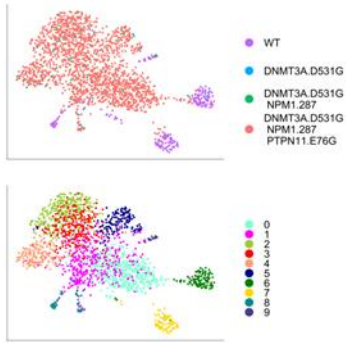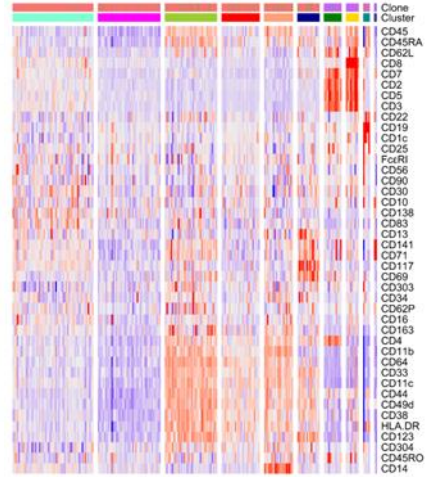

### AML-14

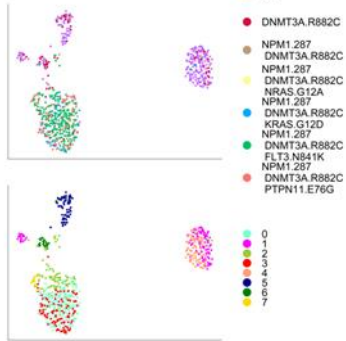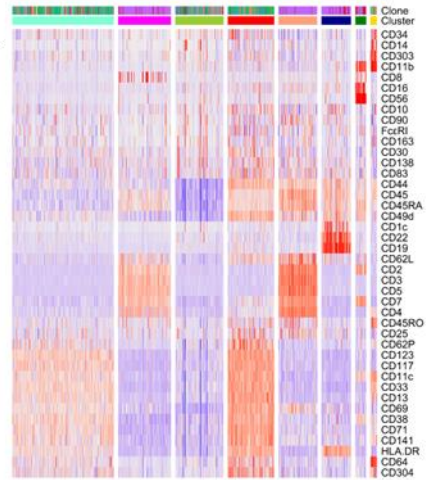

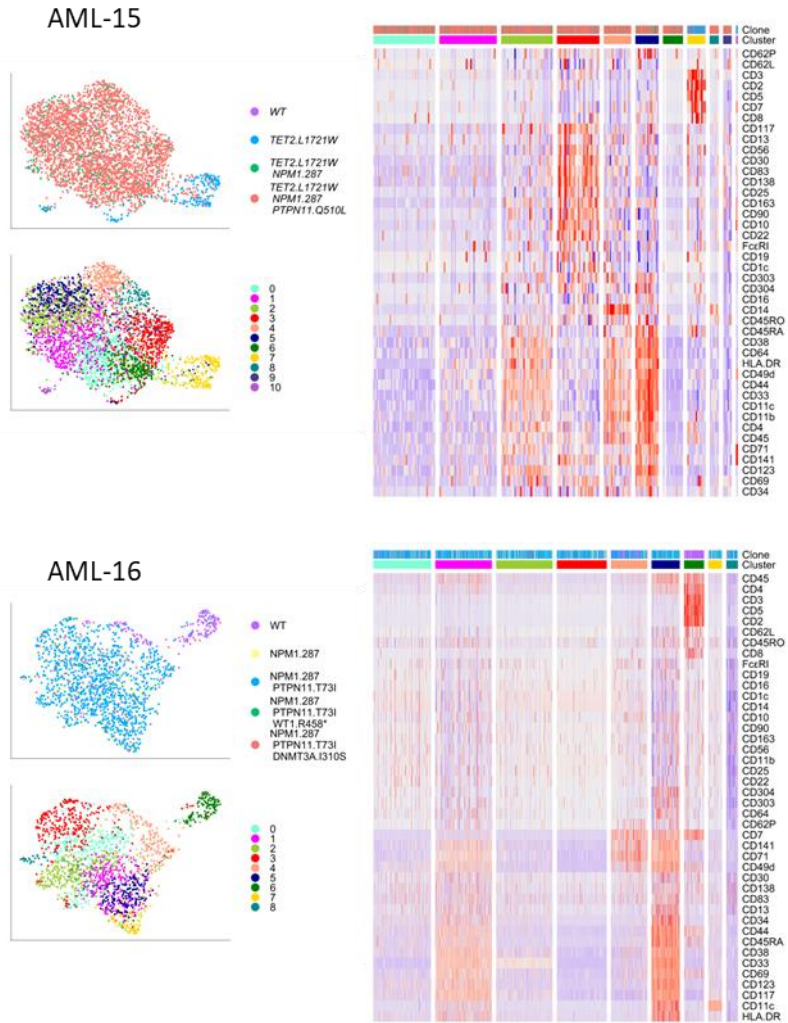

**Supplemental Figure 2.** Cell surface marker expression at the single-cell based on proteomics from peripheral blood and bone marrow primary AML samples. A) For combined samples a UMAP overlaid with genotype and nearest neighbor clustering and a heatmap with select lineage defining markers. B) Individual patients projected onto combined UMAP overlaid with nearest neighbor clustering. C) Individualized UMAP overlaid with genotype and nearest neighbor clustering and a heatmap for each patient.

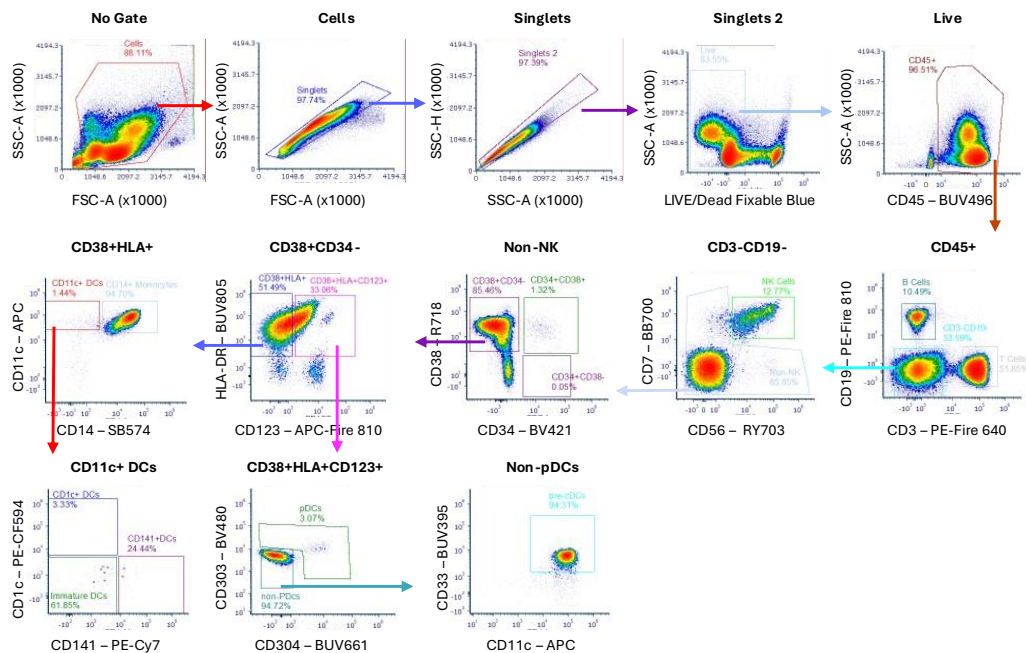

**Supplemental Figure 3.** Gating strategy for primary AML samples.

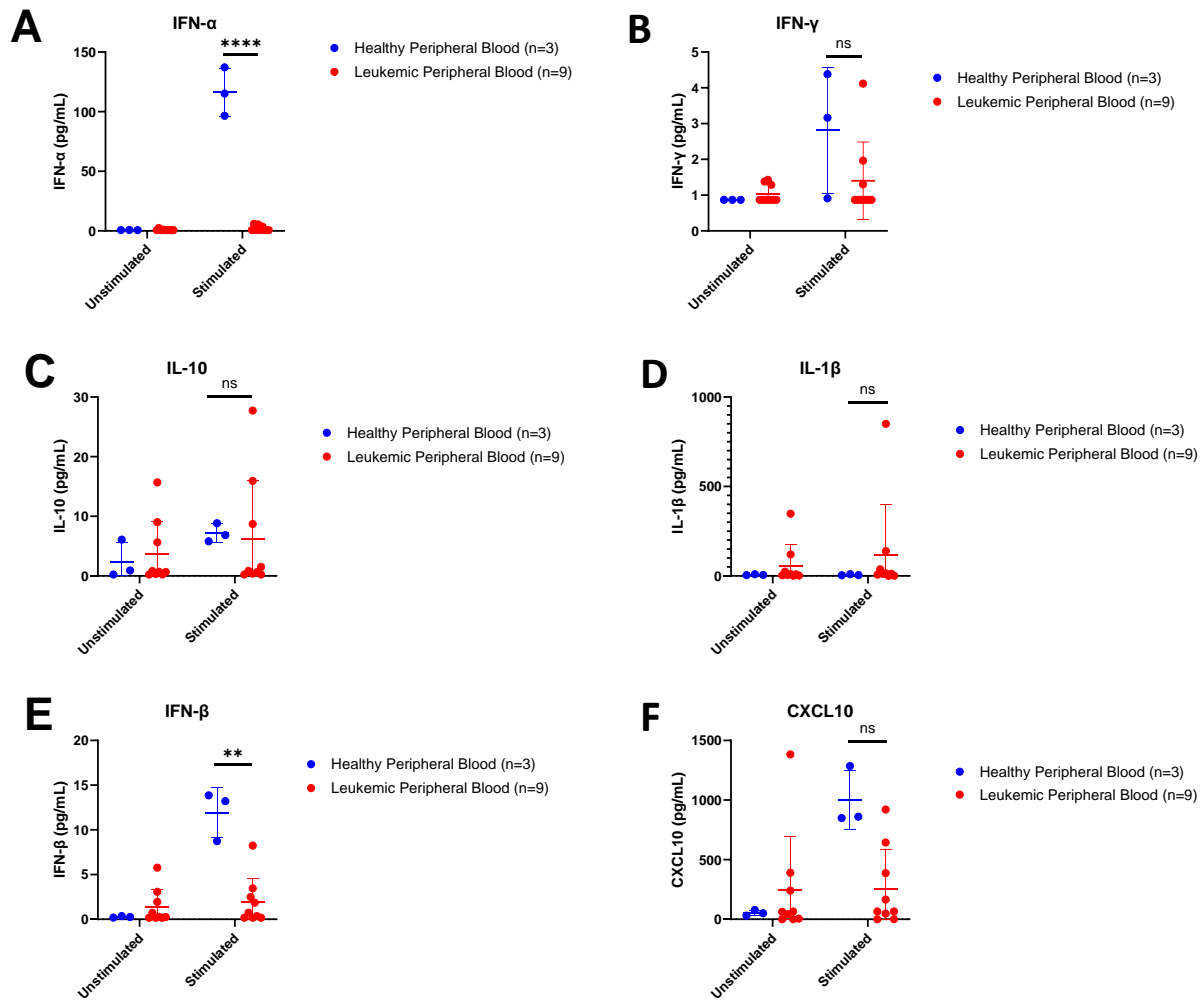

**Supplemental Figure 4.** Cytokine production from the supernatant of healthy and leukemic peripheral blood cells after overnight stimulation with 10 $\mu$ g of CpG. Concentration of (A) IFN- $\alpha$ , (B) IFN- $\gamma$ , (C) IL-10, (D) IL-1 $\beta$ , (E) IFN- $\beta$ , and (F) CXCL10 in pg/mL was measured. Data are presented as mean  $\pm$  standard deviation. \*(FDR) $P \leq 0.01$  and \*\*\*\*(FDR) $P \leq 0.0001$  from ANOVA.

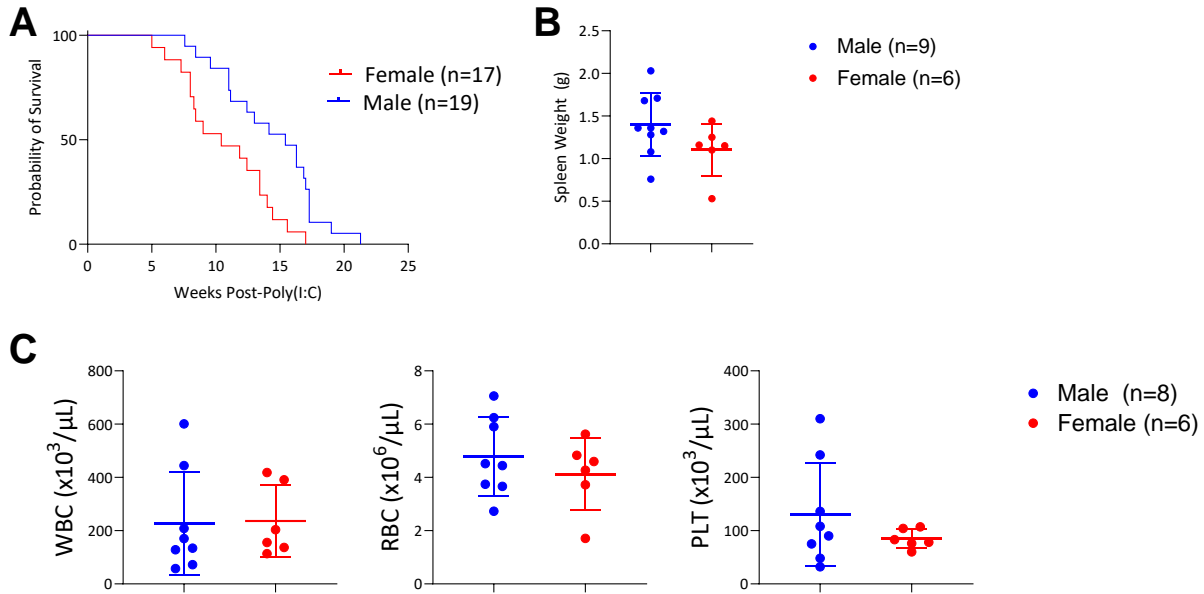

**Supplemental Figure 5.** Sex differences in the novel *Npm1<sup>cA</sup>/Ptpn11<sup>E76K</sup>* mouse. **(A)** Overall survival of *Npm1<sup>cA</sup>/Ptpn11<sup>E76K</sup>* mice based on sex. **(B)** Spleen weight in grams (g) of *Npm1<sup>cA</sup>/Ptpn11<sup>E76K</sup>* mice at death based on sex. **(C)** White blood cell count (WBC), red blood cell count (RBC), and platelet (PLT) count of *Npm1<sup>cA</sup>/Ptpn11<sup>E76K</sup>* mice at death based on sex. Data are presented as mean  $\pm$  standard deviation.

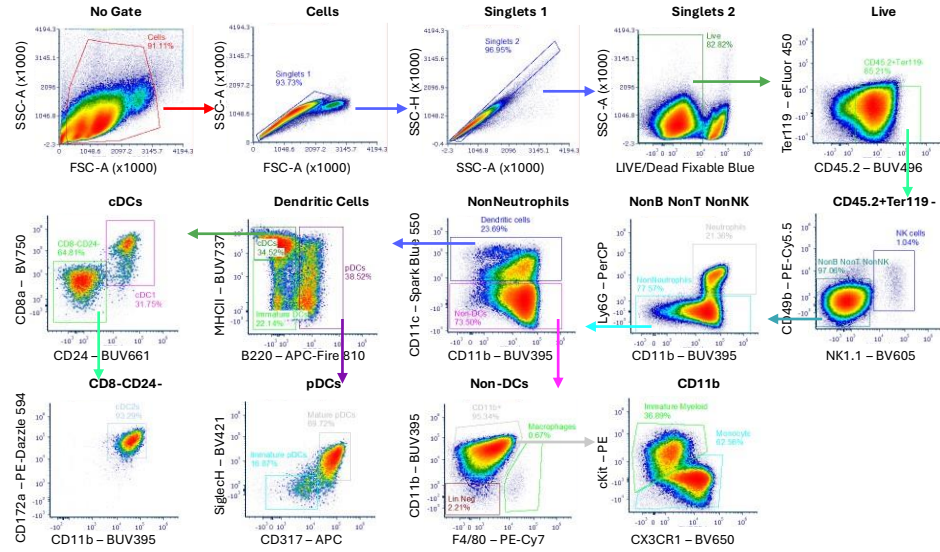

**Supplemental Figure 6.** Gating strategy for spleen immunophenotyping panel for leukocyte populations.

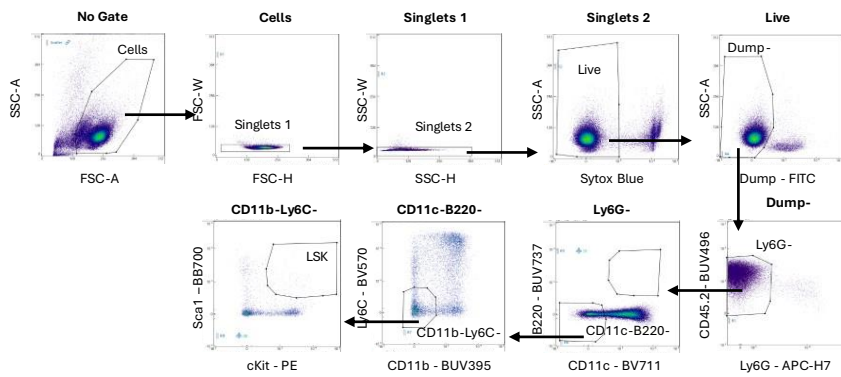

**Supplemental Figure 7.** Sorting strategy for LSK engraftment experiments. Dump channel includes CD3, Ter119, and FcεR1.

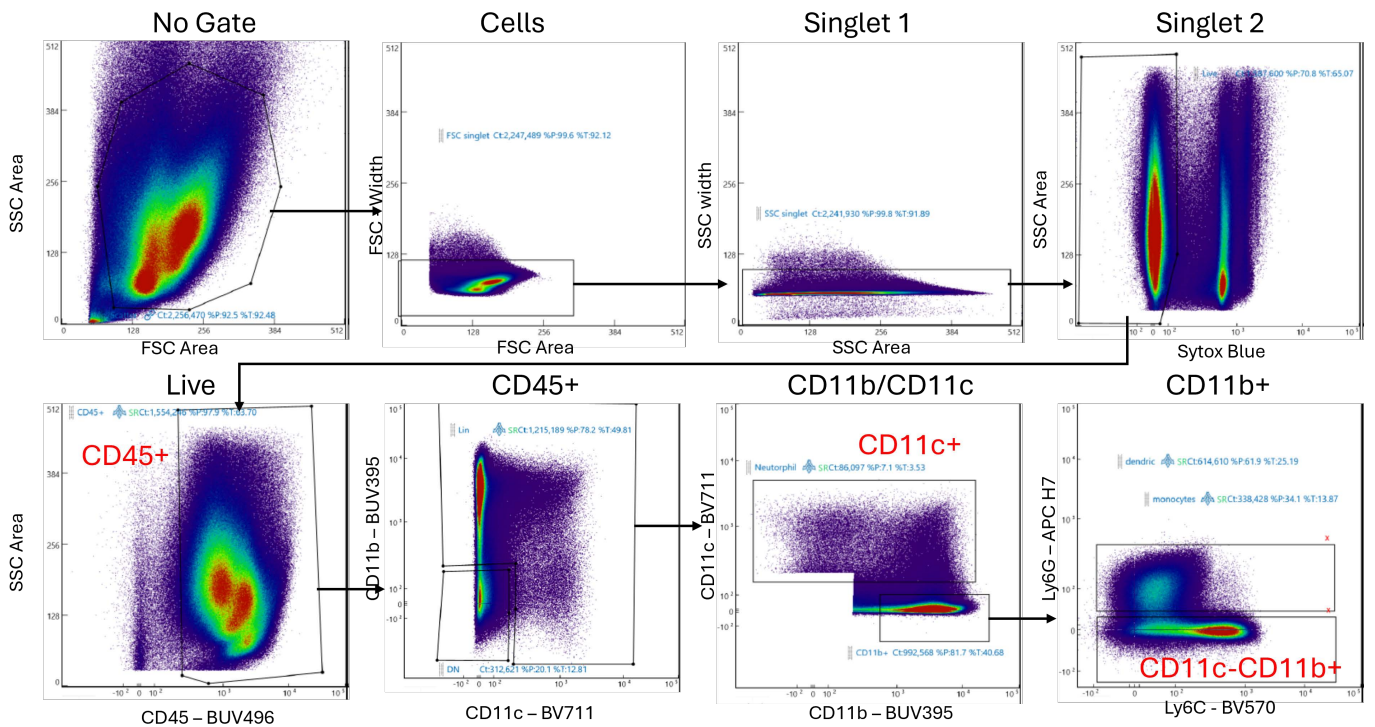

**Supplemental Figure 8.** Sorting strategy for lineage positive population engraftment experiments.
